1 **A systematic review on the incidence of influenza viruses in wastewater matrices:**  
2 **Implications for Public Health**

3 Mbaso Dlamini<sup>1,2\*</sup>, Luyanda Msolo<sup>1,2</sup>, Kingsley Ehi Ebomah<sup>1,2</sup>, Nolonwabo Nontongana<sup>1,2</sup> and  
4 Anthony Ifeanyi Okoh<sup>1,2</sup>

5 <sup>1</sup>SAMRC Microbial Water Quality Monitoring Centre, University of Fort Hare, Alice 5700, South Africa;

6 <sup>2</sup>Applied and Environmental Microbiology Research Group (AEMREG), Department of Biochemistry and  
7 Microbiology, University of Fort Hare, Alice 5700, South Africa

8  
9 \*Correspondence: \*Correspondence: [mbasadlamini0@gmail.com](mailto:mbasadlamini0@gmail.com); Tel: 0736304581

10  
11  
12  
13  
14  
15  
16  
17  
18  
19  
20  
21  
22  
23  
24  
25

|    |                                                                                            |    |
|----|--------------------------------------------------------------------------------------------|----|
| 26 | <b>Table of contents</b>                                                                   |    |
| 27 | <b>Abstract</b> .....                                                                      | 3  |
| 28 | <b>1. Introduction</b> .....                                                               | 4  |
| 29 | 2.1 Epidemiological evidence of human health risks associated with influenza viruses ..... | 7  |
| 30 | 2.2 How wastewater treatment helps prevent disease .....                                   | 9  |
| 31 | 2.2.1 Treatment and control measures .....                                                 | 9  |
| 32 | 2.3 Environmental factors influencing the transmission of the influenza viruses .....      | 10 |
| 33 | 2.4 Pathogenesis of influenza viruses .....                                                | 12 |
| 34 | <b>3. Material and methods</b> .....                                                       | 12 |
| 35 | 3.1 Study objective .....                                                                  | 12 |
| 36 | 3.2 Systematic review .....                                                                | 12 |
| 37 | 3.2.1 Inclusion criteria .....                                                             | 12 |
| 38 | 3.2.2 Exclusion criteria .....                                                             | 13 |
| 39 | 3.2.3 Search strategy .....                                                                | 13 |
| 40 | 3.3 Methods of review .....                                                                | 13 |
| 41 | 3.3.1 Data extraction .....                                                                | 13 |
| 42 | 3.3.2 Data synthesis .....                                                                 | 13 |
| 43 | 3.4 Quality assessment.....                                                                | 13 |
| 44 | <b>4. Results</b> .....                                                                    | 14 |
| 45 | 4.1 Description of studies .....                                                           | 14 |
| 46 | 4.2 Study characteristics .....                                                            | 14 |
| 47 | <b>5. Discussion</b> .....                                                                 | 14 |
| 48 | <b>Conclusion</b> .....                                                                    | 16 |
| 49 | <b>Acknowledgment</b> .....                                                                | 16 |
| 50 | <b>References</b> .....                                                                    | 17 |

51

52 **Abstract**

53 Influenza has historically been and remains a significant global health concern, causing substantial  
54 illness worldwide. Influenza is a serious public health issue in both industrialized and developing  
55 nations and it is characterized as an acute respiratory illness resulting from infection with influenza  
56 virus. Influenza viruses are RNA viruses with a negative sense and enveloped structure. These  
57 viruses possess segmented genomes, with influenza A and B viruses being the prevalent types  
58 affecting human populations. These viruses have been associated with disease outbreaks in some  
59 regions of the world as a result of excrement being introduced into the environment. Given the  
60 global implications of influenza and the limited availability of data for many countries, particularly  
61 in the African region where the prevalence and incidence of influenza remain largely unknown,  
62 there is a lack of published information regarding the detection of influenza viruses. Therefore, the  
63 purpose of this paper is to examine or review the frequency of influenza virus detection in  
64 wastewater samples, serving as an initial step toward gaining a better understanding of the burden  
65 of influenza. This includes exploring its epidemiology, the consequences of severe influenza  
66 infections, and the development of strategies to enhance supportive care and virus-specific  
67 therapies in resource-constrained, low-income settings.

68 **Keywords:** Epidemiology, Influenza, Public Health, Viruses, Wastewater

69

70

71

72

73

74

75

76

77

## 78 **1. Introduction**

79 Influenza viruses are recognized as the primary causative agents of respiratory tract diseases,  
80 resulting in significant health and socioeconomic effects globally (Marco *et al.*, 2020). These  
81 viruses are negative sense, enveloped RNA viruses that contain segmented genomes and are  
82 categorized into four types, namely influenza A, B, C, and D. All four types of influenza viruses  
83 are considered endemic, with types A and B being the most widespread and responsible for causing  
84 influenza, commonly known as the flu. Symptoms of the flu typically include chills, fever,  
85 headache, sore throat, and muscle pain (Brussow, 2021). In severe instances, influenza can lead to  
86 pneumonia, which can be particularly life-threatening for vulnerable populations such as children  
87 and the elderly.

88 In humans, influenza A and B viruses are the most prevalent and impose a significant burden on  
89 the global population (Caini *et al.*, 2019). Transmission occurs through respiratory droplets  
90 released during coughing, talking, and sneezing, as well as through contact with contaminated  
91 surfaces followed by touching the nose or eyes (Lin *et al.*, 2022). In terms of public health impact,  
92 influenza A and B viruses pose the greatest threat, causing seasonal epidemics that affect millions  
93 of individuals (Nickol and Kindrachuk, 2019). While most influenza virus infections are limited  
94 to the upper respiratory tract, some cases can be severe and give rise to complications such as  
95 pneumonia, acute respiratory distress syndrome, and central nervous system involvement (Ma *et*  
96 *al.*, 2020). Numerous studies have drawn attention to the association of influenza A with conditions  
97 like encephalitis, febrile seizures, and Guillain-Barre syndrome (Marco *et al.*, 2020; Beghi *et al.*,  
98 2020; Gusev *et al.*, 2021; Meidaninikjeh *et al.*, 2022).

99 Influenza viruses differ from double-stranded DNA viruses as they consist of single-stranded  
100 RNA. Over time, these viruses undergo genetic changes and continuously evolve. This evolution  
101 occurs in two processes such as antigenic drift and antigenic shift (Hannoun, 2013). Antigenic drift  
102 is the progressive accumulation of genetic mutations within viral genes that are responsible for  
103 generating surface proteins recognized by host antibodies (Naeem *et al.*, 2020). These changes,  
104 also referred to as drift, result in minor alterations in the virus's surface proteins, namely  
105 hemagglutinin and neuraminidase, which are antigens capable of stimulating an immune response,  
106 including antibody development, against the virus (Nooraei *et al.*, 2002). Antigenic drift occurs as  
107 influenza viruses replicate within a host, leading to ongoing modifications over time. However,

108 antigenic shift is of greater concern compared to antigenic drift (Yewdell, 2021). Antigenic shift  
109 can give rise to an influenza virus variant that evades existing antibodies in the population. This  
110 can result in the occurrence of an influenza pandemic (Krammer, 2019). Antigenic shift refers to  
111 a significant genetic alteration in an infectious agent, resulting in a substantial modification in the  
112 antigenic protein. This modification triggers the immune systems of humans and other animals to  
113 produce antibodies. For example, an antigenic shift occurs when there is a sudden and drastic  
114 change in hemagglutinins of influenza type A viruses.

115 The influenza virus undergoes various stages throughout its life cycle such as entry into the host  
116 cell, entry of viral ribonucleoproteins (vRNPs) into the nucleus, viral genome transcription and  
117 replication, export of vRNPs from the nucleus, and assembly and budding at the host cell plasma  
118 membrane. This process culminates in the formation of infectious virus particles which are  
119 subsequently released into the extracellular environment, allowing them to infect new cells (Gill  
120 *et al.*, 2019). These stages are depicted by the sourced diagrams (Figures 2 and 3).

121

122 **Figure 2:** A Pictorial Representation of Influenza Virus Lifecycle

123 **Figure 3:** Illustrative depiction showing the lifecycle of the influenza virus

124 Wastewater management plays a crucial role in controlling the spread of influenza viruses and  
125 other pathogens. There are some key issues related to wastewater management and the circulation  
126 of influenza viruses around the world. Firstly, inadequate sanitation infrastructure, for example,  
127 many regions, especially in developing countries, lack proper sanitation infrastructure, including  
128 sewage treatment plants and wastewater treatment facilities (Wang *et al.*, 2018). This can lead to  
129 the direct discharge of untreated or partially treated wastewater into rivers, lakes, or coastal areas,  
130 potentially contaminating water sources and increasing the risk of spreading influenza viruses.  
131 Urbanization and Overcrowding- rapid urbanization and population growth have put significant  
132 strain on existing wastewater infrastructure in many cities (Habib, 2022). Overcrowding can lead  
133 to inadequate sanitation facilities, leading to the improper management of wastewater. This can  
134 contribute to the spread of influenza viruses among densely populated communities. Thirdly  
135 agricultural runoff, for example in rural areas, agricultural activities can contribute to the  
136 contamination of water bodies with influenza viruses. The use of untreated or poorly treated  
137 wastewater for irrigation or the improper disposal of manure can introduce pathogens into the  
138 environment, which can contaminate water sources and potentially spread influenza viruses (Ali  
139 *et al.*, 2021).

140 Therefore, wastewater is considered a reservoir of a variety of human pathogens such as influenza  
141 viruses that can impact human health and contribute to a range of environmental and health  
142 complications (Shaheen, 2022). These viruses can enter the water cycle when they are expelled  
143 from the fecal matter of infected individuals. (Gerba and Pepper, 2019). The two primary goals of  
144 treating wastewater are to prevent the contamination of water sources and to maintain public health  
145 by preventing the spread of illnesses caused by influenza viruses through the protection of water  
146 resources. Henceforth, this paper is aimed at reviewing the effects on both the environment and  
147 human health caused by the prevalence of influenza viruses in untreated or inadequately treated  
148 wastewater or wastewater matrices. Addressing these issues requires a comprehensive approach  
149 that includes improving sanitation infrastructure, upgrading wastewater treatment facilities,  
150 promoting proper hygiene practices, and raising awareness about the importance of responsible  
151 wastewater management. By implementing effective wastewater management practices, the risk  
152 of spreading influenza viruses and other pathogens can be significantly reduced, protecting public  
153 health and the environment.

## 154 **2.1 Epidemiological evidence of human health risks associated with influenza viruses**

155

156 The flu is a highly contagious viral illness that can infect people across all age groups. However,  
157 certain groups are more vulnerable to its impact, and during pandemics, epidemics, and sporadic  
158 outbreaks, it has been associated with significant mortality rates (Miron *et al.*, 2021). Pregnant  
159 women, children below the age of five (especially those under the age of two), the elderly, and  
160 those undergoing chemotherapy and taking steroids are at a heightened risk of developing severe  
161 illness or complications if infected (Javanian *et al.*, 2021).

162 Individuals can become infected with and transmit the Influenza A virus through various means,  
163 including direct contact with bodily secretions, inhalation of respiratory droplets, and indirect  
164 contact with contaminated objects. This virus is notorious for its significant rates of illness and  
165 death, and it is responsible for both seasonal outbreaks and notable historical influenza pandemics  
166 (Bailey *et al.*, 2018). On the other side, human infections with influenza B viruses pose a  
167 continuing concern to public health. According to Javanian *et al.* (2021), direct contact with an  
168 infected individual is the main risk factor for human influenza B infection. For instance, large  
169 quantities of viral particles that are harmful to humans are expelled from infected individuals,  
170 which are then introduced into wastewater and later cause waterborne infections all over the world  
171 (Ahmad *et al.*, 2021).

172 Growing concerns have arisen in light of notable viral outbreaks in recent years, underscoring the  
173 potential for a severe viral pandemic originating from influenza viruses present in wastewater  
174 matrices. As highlighted by Huremovic (2019), the public's apprehension is well-founded,  
175 considering the catastrophic impact that viral pandemics can have. Notably, historical records  
176 indicate that influenza pandemics killed people in absolute numbers than any other disease  
177 outbreak in recorded history. Another example, looking at the results of the detection of influenza  
178 A and B in the influent of two WWTPs in Germany represents how wastewater matrices are  
179 regarded as a reservoir of a variety of influenza viruses and a major cause of global concern  
180 (Dumke *et al.*, 2022). Based on the findings of the study, it was proven that two German cities'  
181 municipal wastewater contained respiratory virus RNA. For example, influenza B virus was  
182 detected in 36.0% and 57.7% of the sampled wastewater. It was concluded that more research  
183 should be done using more samples from various places to learn more or expand knowledge about

184 the prevalence of influenza in wastewater matrices. Particularly in situations where preventive  
185 measures to mitigate the transmission of respiratory viral infections are lacking, it becomes crucial  
186 to examine and comprehend the broader implications of influenza viruses present in wastewater.

187 During the spring of 2022, The City of Ottawa and its neighborhoods experienced an unusual spike  
188 in influenza virus activity, which allowed for the collection of wastewater samples containing  
189 influenza viruses (Mercier *et al.*, 2022). The findings of the study were then applied to improve a  
190 procedure for measuring influenza virus RNA in wastewater. Their improved method was then  
191 used to measure influenza virus RNA in wastewater from the whole city of Ottawa, Ontario,  
192 Canada, as well as from three different neighborhoods. Influenza A virus was demonstrated in  
193 10.3% of the samples from treatment plant 1 (WRRF), 3.1% from treatment plant 2, and 0.1% of  
194 the samples from plant 3. These results concur with those of another research that identified the  
195 influenza A virus in wastewater matrices (Wolfe *et al.*, 2022). Therefore, based on the findings,  
196 the processing of wastewater samples and detection of influenza viral signals was performed and  
197 it was concluded that wastewater indeed represents a reservoir of numerous pathogens.

198 To examine the potential of influenza transmission channels, several investigations of the influenza  
199 virus in wastewater have been conducted. Few research has described a procedure for successfully  
200 detecting influenza virus in wastewaters up to this point (Wurtzer *et al.*, 2021). For example, a  
201 recent study showed a good correlation between wastewater measurements of influenza A viruses  
202 and reported clinical IAV cases seen as part of monitoring systems for athletes at Stanford  
203 University and Michigan University's campus (Mercier *et al.*, 2022). However, there is a dearth of  
204 knowledge on the measurement, trends, and, most critically, the relationship between the influenza  
205 virus signal in wastewater in cities and neighborhood communities. Therefore, new information  
206 linked to influenza WWS is thus necessary to clarify other characteristics of the influenza virus in  
207 wastewater matrices. According to (Schwab and Malleret, 2020), wastewater surveillance for  
208 influenza possesses several advantageous characteristics, including its ability to provide  
209 anonymous, aggregated, cost-effective, and rapid monitoring of a substantial portion of  
210 communities. Due to its involuntary contributions, WWS serves as an important tool for public  
211 health units or agencies.

212



213 **Figure 4:** Studies conducted across the globe on the prevalence of influenza viruses associated  
214 with wastewater.

215

216 **Table 1:** Most productive authors in research related to the prevalence of Influenza viruses in  
217 wastewater milieu from 2012 to 2022 (Scopus and google scholar)

## 218 **2.2 How wastewater treatment helps prevent disease**

219 Wastewater treatment is the process of removing, eliminating, or inactivating the majority of  
220 contaminants and disease-causing organisms, such as influenza viruses from wastewater (Anand  
221 *et al.*, 2020). Globally, wastewater poses significant risks of infections, which accounts for around  
222 a million fatalities each year, nearly half of which are children and more than 90% of which occur  
223 in underdeveloped nations. The main cause of these fatalities is ingesting fecal pathogens from  
224 people or animals (Javanian *et al.*, 2021). Hence, there is a desire among researchers to create and  
225 examine criteria based on a clearer framework for determining the danger of influenza viruses in  
226 wastewater. A technique known as wastewater-based epidemiology (WBE), which is a tool used  
227 to estimate the likelihood of infectious diseases among individuals exposed to materials associated  
228 with waste, is becoming more popular as a result of this aim. According to Lin *et al.*, (2022), this  
229 tool, enables the identification and surveillance of both pandemic and seasonal influenza  
230 outbreaks.

### 231 **2.2.1 Treatment and control measures**

232

233 The WHO and the National Institutes of Health have acknowledged the enormous worldwide  
234 burden of infectious disease epidemics caused by the influenza virus and the necessity to build  
235 prediction and preventive systems (Xagorarakis *et al.*, 2020). According to Korkmaz *et al.*, (2021),  
236 suggest that immunization is the most effective measure to prevent influenza infection and its  
237 sequelae.

238 Antiviral drugs play a crucial role in supporting the body's natural defenses against specific viruses  
239 that cause diseases. These medications are recognized as essential tools in the prevention and  
240 containment of viruses (Peterson *et al.*, 2020). Individuals who are at high risk for flu-related  
241 complications, such as older adults or those with weakened immune systems, should seek antiviral

242 treatment as early as possible. Early administration of antiviral medication can result in a milder  
243 illness, preventing the need for hospitalization in vulnerable individuals susceptible to severe flu  
244 complications (Kausar *et al.*, 2021). Moreover, certain studies suggest that early use of antiviral  
245 drugs can reduce the risk of mortality among hospitalized individuals with influenza.

246 Currently, there are three recommended antiviral medications, namely oseltamivir, zanamivir, and  
247 peramivir, for the treatment of influenza. These drugs act by bolstering the immune system's ability  
248 to combat viral infections and reducing the viral load present in the body (Anand *et al.*, 2020).  
249 Rapid diagnosis and treatment are crucial, as antiviral drugs can effectively treat both influenza A  
250 and B infections when administered within 48 hours of the onset of flu symptoms. For instance,  
251 oseltamivir, an antiviral drug commonly used, specifically targets and treats both influenza A and  
252 B viruses. It alleviates flu-related symptoms, resulting in a reduction in severity and a shortened  
253 recovery period of one to two days (Kalra *et al.*, 2011). These symptoms include stuffy nose,  
254 coughing, sore throat, fever or chills, pains, and fatigue. Oseltamivir functions by targeting the  
255 influenza virus, impeding its proliferation within the body, and alleviating flu symptoms.

### 256 **2.3 Environmental factors influencing the transmission of the influenza viruses**

257 Several factors influence the severity and transmission of influenza, including the natural and  
258 acquired hosts, viral-host interactions, environmental persistence, virus stability, and  
259 anthropogenic interventions (Bai *et al.*, 2021). Variations in temperature, humidity, pH, salinity,  
260 air pollution, and solar radiation can have an impact on a virus' ability to survive in varied habitats.  
261 In temperate regions with higher latitudes, influenza tends to thrive and spread more effectively in  
262 cool and dry conditions, whereas, in tropical and subtropical areas characterized by humid and  
263 rainy climates, outbreaks are more prevalent, as observed by Sooryanarain and Elankumaran  
264 (2015).

265 Viruses that target the human respiratory system and give rise to diseases possess diverse  
266 mechanisms of transmission. However, they all share the capability to spread among individuals.  
267 The transmissibility of these viruses is influenced by the circumstances in which a pathogen and a  
268 host come into contact. Various hypotheses have been proposed to elucidate the intricate  
269 relationship between temperature, humidity, and the notable seasonality of viruses (Moriyana *et*  
270 *al.*, 2020). These theories encompass alterations in host behavior and adjustments in the virus's  
271 susceptibility to infection and stability under different environmental conditions. High

272 temperatures can cause the denaturation of viral capsid proteins' secondary structures, while cold  
273 temperatures can lead to nucleic acid degradation, for example, disease prevalence tends to  
274 decrease as the temperature rises Wolkoff *et al.*, (2021)

275 The transmissibility of viruses can be impacted by ambient humidity, which has implications not  
276 only for the stability of the virus but also for the size of respiratory droplets as the water content  
277 evaporates. The size of these droplets, in turn, plays a role in determining whether they settle  
278 quickly to the ground or remain airborne long enough to be inhaled by a susceptible host (Wang  
279 *et al.*, 2021). Moreover, the pH levels can influence the transmission of influenza viruses. For  
280 instance, when the pH reaches a certain acidic threshold, it triggers a conformational change in the  
281 HA protein, exposing the fusion peptide. This critical process initiates the fusion of the virus with  
282 the host, leading to the uncoating and the release of the viral genome into the host cell's cytoplasm  
283 (Gill *et al.*, 2019).

284

285 **Figure 5:** A dendrogram that illustrates some of the notable factors that influence the transmission  
286 of influenza viruses in different regions.

287

## 288 **2.4 Pathogenesis of influenza viruses**

289 Influenza viruses are known to regularly circulate within human population worldwide, giving rise  
290 to seasonal epidemics (Petrova and Russell, 2018). As they circulate, these viruses undergo gradual  
291 mutations through a process referred to as antigenic drift. Upon respiratory transmission, the virus  
292 attaches itself to respiratory epithelial cells in the trachea and bronchi, subsequently penetrating  
293 them. This leads to viral replication, destroying the host cell (Wang *et al.*, 2021).

294 The pathogenicity of the influenza virus relies on the interplay between viral proteins and host  
295 immune responses, encompassing both innate and acquired immunity. This highlights the  
296 significance of both viral factors and the host immune system in determining the course of  
297 influenza pathogenesis. The immune system serves as a defense mechanism against influenza virus  
298 infection. When respiratory epithelial cells or alveolar macrophages are infected by IAV, the  
299 single-stranded RNA of the virus is recognized by toll-like receptor (TLR) 7 and retinoic acid-  
300 inducible gene-I (Wu *et al.*, 2015). Activation of the TLR7 and RIG-I signaling pathways leads  
301 to the production of type I interferons and triggers antiviral responses in the host (Moriyama and  
302 Ichinohe, 2019).

## 303 **3. Material and methods**

304 The study followed the updated Preferred Reporting Items for Systematic Reviews and Meta-  
305 Analyses extension for PRISMA guidelines (Page *et al.*, 2021).

### 306 **3.1 Study objective**

307 The objective of this study was to investigate the frequency of detection of influenza viruses in  
308 wastewater matrices.

### 309 **3.2 Systematic review**

310 The following inclusion and exclusion criteria were used when selecting the studies to be included  
311 in a systematic review.

#### 312 **3.2.1 Inclusion criteria**

313 Studies that measure Influenza viruses in wastewater were included in this study. Articles were  
314 limited to those published in English and those conducted in communities or populations,  
315 including private/public facilities such as hospitals connected to sewer lines. The studies which

316 provide intelligible information on the method of detecting influenza viruses using: real-time  
317 reverse transcriptase quantitative polymerase chain reaction (RT-qPCR) was considered for  
318 inclusion in the systematic review. Studies that reported data based on the following metrics were  
319 also included: (1) detection of Influenza viruses from wastewater treatment plants (WWTPs); (2)  
320 linking data obtained from the WWTPs to RNA prevalence, resulting in an estimated value for  
321 community infection.

### 322 **3.2.2 Exclusion criteria**

323 Summarized publications, abstracts, subscription-based articles without access, newspaper reports  
324 and studies using Influenza viruses in other matrices or contexts other than in wastewater, were  
325 excluded from this review.

### 326 **3.2.3 Search strategy**

327 Searches were performed using Google Scholar and Scopus databases using the keywords  
328 mentioned and a combination of the keywords. Other website such as the World Health  
329 Organisation library databases was also used to search for data. The keywords used were based on  
330 the terminology normally used in this subject, including: “Wastewater” OR “Epidemiology” AND  
331 “Influenza” OR “Viruses”. The searched articles were screened from their titles, abstracts, and full  
332 text to select the eligible studies.

## 333 **3.3 Methods of review**

### 334 **3.3.1 Data extraction**

335 Data was extracted from google scholar and scopus databases by reviewing titles, abstracts for  
336 inclusion and exclusion criteria.

### 337 **3.3.2 Data synthesis**

338 A systematic review and meta-analyses were done. Therefore, as meta-analyses was performed  
339 statistical heterogeneity and publication bias were not assessed.

## 340 **3.4 Quality assessment**

341 Included articles were assessed for methodologies bias using the previously described tool by  
342 Wolfe *et al.*, 2022. Items on the tool include the following characteristics: Clarity of sampling  
343 approach; consistent use of proper processing for virus concentration; method of virus extraction

344 and detection; presence of viral quantification process, clarity on sampling site(s) and transparency  
345 in results (including statistics) presentation.

346

## 347 **4. Results**

### 348 **4.1 Description of studies**

349 Our keyword search found 418 potential articles (68 from Scopus and 350 from google scholar).  
350 Following further screening, 68 reports were excluded. 20 articles (5 from scopus and 15 from  
351 google scholar) were used for data extraction.

### 352 **4.2 Study characteristics**

353 Twenty articles (5 from scopus and 15 from google scholar) were reviewed for qualitative  
354 synthesis. Summarized characteristics from each article: authors, country, population size, number  
355 of samples collected and PCR methods and targeted genes were used (Table 2). Most studies were  
356 conducted in developed countries, whereas only one study was conducted in the African region.  
357 Municipal wastewater treatment facilities were primarily used to perform the studies, whereas  
358 some studies chose a defined community, such as hospitals, universities, or neighbourhoods.

## 359 **5. Discussion**

360 Twenty studies (5 from scopus and 15 from google scholar) were selected in the current review.  
361 Our review provides some insights into the potential risks posed by influenza viruses detected in  
362 wastewater matrices which serve as an initial step toward gaining a better understanding of the  
363 burden of influenza in the environment. This includes exploring its epidemiology, the  
364 consequences of severe influenza infections and by preventing the spread of illnesses caused by  
365 influenza viruses through the fortification of water resources

366 Monitoring influenza viruses in wastewater matrices is a crucial epidemiological and public health  
367 model with a number of essential advantages such as (1) Early detection and Monitoring-  
368 Wastewater surveillance enables the early detection and frequency of influenza viruses in a  
369 community, prior to the reporting of clinical cases. This can assist public health authorities track  
370 changes over time and can provide valuable insights into the prevalence of the virus in a population  
371 (Sim *et al.*, 2020). (2) Wastewater monitoring offers a population-level perspective, enabling a

372 more thorough evaluation of the virus's presence throughout an area or community. This  
373 information can help public health authorities to prepare and allocate resources and timeously  
374 respond effectively to outbreaks. (3) Early Warning System: Monitoring wastewater can act as an  
375 early warning system for epidemics that can occur, for example increased public health testing and  
376 treatments may be required in the affected region if a significant increase in viral RNA is detected  
377 in wastewater. (4) Tracking Variants: Influenza viruses have the ability to mutate and may have  
378 distinct characteristics, for example influenza can undergo small genetic changes, called point  
379 mutations, which can result in slightly different strains (Shepard *et al.*, 2016).

380 Therefore, wastewater surveillance can help in tracking the prevalence of different influenza  
381 strains and variants in a community, aiding in vaccine development and distribution strategies (Lin  
382 *et al.*, 2022). In summary, surveilling influenza viruses in wastewater matrices is a valuable tool  
383 for public health authorities and researchers. It offers population-level data, cost-effectiveness, and  
384 the ability to track variants, ultimately aiding in the prevention and control of influenza outbreaks.

385 The scarcity of studies conducted in the African region on the prevalence of influenza viruses in  
386 wastewater matrices can be attributed to several factors such as limited infrastructure, data  
387 collection challenges, limited research collaboration, low awareness and seasonal nature of  
388 influenza (Shaheen *et al.*, 2020). For example, limited infrastructure: Many African countries face  
389 challenges in terms of infrastructure and resources for scientific research, including wastewater  
390 surveillance. Lack of financial assistance, laboratory facilities and trained personnel can hinder the  
391 ability to conduct such studies. Data collection challenges: collecting and analyzing wastewater  
392 samples for influenza surveillance requires specialized equipment and expertise. In many African  
393 countries, these capabilities may be lacking or underdeveloped. Low awareness: Influenza  
394 surveillance in wastewater is a relatively new concept, and there may be a lack of awareness or  
395 understanding of its potential benefits among public health officials and researchers in the African  
396 region. Seasonal nature of influenza: Influenza infections tends to be seasonal in many regions,  
397 including Africa, which can make it more difficult to conduct year-round surveillance and may  
398 limit the perceived urgency of such studies (Moriyama *et al.*, 2020).

399 Therefore, to address the scarcity of studies in the African region, it is essential to prioritize  
400 capacity building, promote international collaboration, increase awareness of the importance of  
401 wastewater surveillance, and allocate resources specifically for this purpose. Investing in research

402 infrastructure and training for local researchers and institutions can help bridge the gap and  
403 contribute to a more comprehensive understanding of influenza viral infections in the region.  
404 Additionally, raising awareness about the potential benefits of wastewater surveillance for public  
405 health can encourage greater research efforts in this area.

## 406 **Conclusion**

407 Influenza viruses continue to pose a significant burden on the global population, leading to ongoing  
408 challenges in the healthcare system and raising concerns about the increasing frequency of  
409 epidemics worldwide. To the best capacity of our knowledge, many of the variables and factors  
410 involved in the transmission of infectious diseases through wastewater are limited and often  
411 unpredictable. Additionally, there are significant gaps regarding the potential role of wastewater  
412 matrices in spreading respiratory viruses, specifically influenza viruses. To address these issues, it  
413 is crucial for environmental engineers, medical virologists, and public health researchers to  
414 collaborate and develop effective methods for treating influenza viruses present in complex sample  
415 matrices like wastewater. This necessitates implementing a treatment process that includes site  
416 restrictions to reliably reduce the concentration of pathogens to a safe level before human or animal  
417 contact. In conclusion, there is a pressing need for surveillance techniques or tools that can  
418 accurately estimate the number, epidemiology, and distribution of influenza viruses. Such  
419 measures are essential for timely intervention and to prevent the further spread of the disease.

## 420 **Acknowledgment**

421 We are grateful to the South African Medical Research Council and National Research Foundation  
422 for financial support.

423

424

425

426



427 **References**

- 428 Anand, A., Rajchakit, U. and Sarojini, V., 2020. Detection and removal of biological contaminants  
429 in water: the role of nanotechnology. In *Nanomaterials for the Detection and Removal of*  
430 *Wastewater Pollutants* (pp. 69-110). Elsevier.
- 431 Bai, Y., Jones, J.C., Wong, S.S. and Zanin, M., 2021. Antivirals targeting the surface glycoproteins  
432 of influenza virus: Mechanisms of action and resistance. *Viruses*, 13(4), p.624.
- 433 Bailey, E.S., Choi, J.Y., Fieldhouse, J.K., Borkenhagen, L.K., Zemke, J., Zhang, D. and Gray,  
434 G.C., 2018. The continual threat of influenza virus infections at the human–animal interface: what  
435 is new from a one health perspective? *Evolution, medicine, and public health*, 2018(1), pp.192-  
436 198.
- 437 Beghi, E., Feigin, V., Caso, V., Santalucia, P. and Logroscino, G., 2020. COVID-19 infection and  
438 neurological complications: present findings and future predictions. *Neuroepidemiology*, 54(5),  
439 pp.364-369.
- 440 Bi, C., Ramos-Mandujano, G., Tian, Y., Hala, S., Xu, J., Mfarrej, S., Esteban, C.R., Delicado,  
441 E.N., Alofi, F.S., Khogeer, A. and Hashem, A.M., 2021. Simultaneous detection and mutation  
442 surveillance of SARS-CoV-2 and multiple respiratory viruses by rapid field-deployable  
443 sequencing. *Med*, 2(6), pp.689-700.
- 444 Boehm, A.B., Hughes, B., Duong, D., Chan-Herur, V., Buchman, A., Wolfe, M.K. and White,  
445 B.J., 2022. Wastewater surveillance of human influenza, metapneumovirus, parainfluenza,  
446 respiratory syncytial virus (RSV), rhinovirus, and seasonal coronaviruses during the COVID-19  
447 pandemic. *medRxiv*, pp.2022-09.
- 448 Brisebois, E., Veillette, M., Dion-Dupont, V., Lavoie, J., Corbeil, J., Culley, A. and Duchaine,  
449 C., 2018. Human viral pathogens are pervasive in wastewater treatment center aerosols. *Journal*  
450 *of Environmental Sciences*, 67, pp.45-53.
- 451 Brüssow, H., 2021. Clinical evidence that the pandemic from 1889 to 1891 commonly called the  
452 Russian flu might have been an earlier coronavirus pandemic. *Microbial Biotechnology*, 14(5),  
453 pp.1860-1870.
- 454 Caini, S., Kuszniierz, G., Garate, V.V., Wangchuk, S., Thapa, B., de Paula Júnior, F.J., Ferreira de  
455 Almeida, W.A., Njouom, R., Fasce, R.A., Bustos, P. and Feng, L., 2019. The epidemiological  
456 signature of influenza B virus and its B/Victoria and B/Yamagata lineages in the 21st century.  
457 *PloS one*, 14(9), p.e0222381.
- 458 Chauhan, R.P. and Gordon, M.L., 2022. An overview of influenza A virus genes, protein functions,  
459 and replication cycle highlighting important updates. *Virus Genes*, 58(4), pp.255-269.

- 460 Dumke, R., Geissler, M., Skupin, A., Helm, B., Mayer, R., Schubert, S., Oertel, R., Renner, B.  
461 and Dalpke, A.H., 2022. Simultaneous detection of SARS-CoV-2 and influenza virus in  
462 wastewater of two cities in Southeastern Germany, January to May 2022. *International journal*  
463 *of environmental research and public health*, 19(20), p.13374.
- 464 Gaidet, N., Caron, A., Cappelle, J., Cumming, G.S., Balanço, G., Hammoumi, S., Cattoli, G.,  
465 Abolnik, C., Servan de Almeida, R., Gil, P. and Fereidouni, S.R., 2012. Understanding the  
466 ecological drivers of avian influenza virus infection in wildfowl: a continental-scale study across  
467 Africa. *Proceedings of the Royal Society B: Biological Sciences*, 279(1731), pp.1131-1141.
- 468 Gerba, C.P. and Pepper, I.L., 2019. Microbial contaminants. *Environmental and pollution science*,  
469 pp.191-217.
- 470 Ghernaout, D., Elboughdiri, N. and Al Arni, S., 2020. New insights towards disinfecting viruses–  
471 short notes. *Journal of Water Reuse and Desalination*, 10(3), pp.173-186.
- 472 Gill, S., Catchpole, R. and Forterre, P., 2019. Extracellular membrane vesicles in the three domains  
473 of life and beyond. *FEMS microbiology reviews*, 43(3), pp.273-303.
- 474 Gusev, E.I., Martynov, M.Y., Boyko, A.N., Voznyuk, I.A., Latsh, N.Y., Sivertseva, S.A., Spirin,  
475 N.N. and Shamalov, N.A., 2021. The novel coronavirus infection (COVID-19) and nervous system  
476 involvement: mechanisms of neurological disorders, clinical manifestations, and the organization  
477 of neurological care. *Neuroscience and Behavioral Physiology*, 51, pp.147-154.
- 478 Huremović, D., 2019. A brief history of pandemics (pandemics throughout history). *Psychiatry of*  
479 *pandemics: a mental health response to infection outbreak*, pp.7-35.
- 480 Javanian, M., Barary, M., Ghebrehewet, S., Koppolu, V., Vasigala, V. and Ebrahimpour, S., 2021.  
481 A brief review of influenza virus infection. *Journal of Medical Virology*, 93(8), pp.4638-4646.
- 482 Kalra, M., Khatak, M. and Khatak, S., 2011. Cold and flu: conventional vs. botanical and  
483 nutritional therapy. *Int J Drug Dev Res*, 3(1), pp.314-327.
- 484 Kaplan, G.G., Tang, W., Banerjee, R., Adigopula, B., Underwood, F.E., Tanyingoh, D., Wei, S.C.,  
485 Lin, W.C., Lin, H.H. and Li, J., 2019. Population density and risk of inflammatory bowel disease:  
486 a prospective population-based study in 13 countries or regions in Asia-Pacific. *Official journal of*  
487 *the American College of Gastroenterology| ACG*, 114(1), pp.107-115.
- 488 Kausar, S., Said Khan, F., Ishaq Mujeeb Ur Rehman, M., Akram, M., Riaz, M., Rasool, G., Hamid  
489 Khan, A., Saleem, I., Shamim, S. and Malik, A., 2021. A review: Mechanism of action of antiviral  
490 drugs. *International journal of immunopathology and pharmacology*, 35, p.20587384211002621.
- 491 Kevill, J.L., Lambert-Slosarska, K., Pellett, C., Woodhall, N., Pântea, I., Alex-Sanders, N. and  
492 Jones, D.L., 2022. Assessment of two types of passive sampler for the efficient recovery of  
493 SARS-CoV-2 and other viruses from wastewater. *Science of the Total Environment*, 838,  
494 p.156580.

- 495 Kikkert, M., 2020. Innate immune evasion by human respiratory RNA viruses. *Journal of innate*  
496 *immunity*, 12(1), pp.4-20.
- 497 Korkmaz, N., Nazik, S., Gümüştakım, R.Ş., Uzar, H., Kul, G., Tosun, S., Torun, A., Demirbakan,  
498 H., Seremet Keskin, A., Kaçmaz, A.B. and Erdem, H.A., 2021. Influenza vaccination rates,  
499 knowledge, attitudes and behaviours of healthcare workers in Turkey: A multicentre study.  
500 *International Journal of Clinical Practice*, 75(1), p.e13659.
- 501 Krammer, F., 2019. The human antibody response to influenza A virus infection and vaccination.  
502 *Nature Reviews Immunology*, 19(6), pp.383-397.
- 503 Lin, N., Servetas, S., Jackson, S., Lippa, K., Parratt, K., Mattson, P., Beahn, C., Mattioli, M.,  
504 Gutierrez, S., Focazio, M. and Smith, T., 2022. Report on the DHS/NIST Workshop on Standards  
505 for an Enduring Capability in Wastewater Surveillance for Public Health (SWWS Workshop). In  
506 *NIST Special Publication*. National Institute of Standards and Technology.
- 507 Ma, X., Liang, M., Ding, M., Liu, W., Zhou, X. and Ren, H., 2020. Extracorporeal membrane  
508 oxygenation (ECMO) in critically ill patients with coronavirus disease 2019 (COVID-19)  
509 pneumonia and acute respiratory distress syndrome (ARDS). *Medical science monitor:*  
510 *international medical journal of Experimental and clinical research*, 26, pp.e925364-1.
- 511 Marco, C., Massimo, C., Alessandro, T., Wen-Can, J., Cheng-Bin, W. and Sergio, B., 2020. The  
512 COVID-19 pandemic. *Critical Reviews in Clinical Laboratory Sciences*, 57(6), pp.365-388
- 513 Meidaninikjeh, S., Sabouni, N., Taheri, M., Borjkhani, M., Bengar, S., Majidi Zolbanin, N.,  
514 Khalili, A. and Jafari, R., 2022. SARS-CoV-2 and Guillain–Barré Syndrome: lessons from viral  
515 infections. *Viral Immunology*, 35(6), pp.404-417.
- 516 Mercier, E., D’Aoust, P.M., Thakali, O., Hegazy, N., Jia, J.J., Zhang, Z., Eid, W., Plaza-Diaz, J.,  
517 Kabir, M.P., Fang, W. and Cowan, A., 2022. Municipal and neighborhood-level wastewater  
518 surveillance and subtyping of an influenza virus outbreak. *Scientific Reports*, 12(1), p.15777.
- 519 Moriyama, M. and Ichinohe, T., 2019. High ambient temperature dampens adaptive immune  
520 responses to influenza A virus infection. *Proceedings of the National Academy of Sciences*, 116(8),  
521 pp.3118-3125.
- 522 Moriyama, M., Hugentobler, W.J. and Iwasaki, A., 2020. Seasonality of respiratory viral  
523 infections. *Annual review of virology*, 7, pp.83-101.
- 524 Naem, A., Elbakkouri, K., Alfaiz, A., Hamed, M.E., Al saran, H., AlOtaiby, S., Enani, M. and  
525 Alosaimi, B., 2020. Antigenic drift of hemagglutinin and neuraminidase in seasonal H1N1

- 526 influenza viruses from Saudi Arabia in 2014 to 2015. *Journal of Medical Virology*, 92(12),  
527 pp.3016-3027.
- 528 Nickol, M.E. and Kindrachuk, J., 2019. A year of terror and a century of reflection: perspectives  
529 on the great influenza pandemic of 1918–1919. *BMC infectious diseases*, 19(1), pp.1-10
- 530 Nooraei, S., Bahrulolum, H., Hoseini, Z.S., Katalani, C., Hajizade, A., Easton, A.J. and Ahmadian,  
531 G., 2021. Virus-like particles: preparation, immunogenicity and their roles as nanovaccines and  
532 drug nanocarriers. *Journal of nanobiotechnology*, 19(1), pp.1-27.
- 533 O'Brien, E. and Xagorarakis, I., 2019. A water-focused one-health approach for early detection  
534 and prevention of viral outbreaks. *One Health*, 7, p.100094.
- 535 O'Brien, E. and Xagorarakis, I., 2019. A water-focused one-health approach for early detection  
536 and prevention of viral outbreaks. *One Health*, 7, p.100094.
- 537 Page, M.J., McKenzie, J.E., Bossuyt, P.M., Boutron, I., Hoffmann, T.C., Mulrow, C.D., Shamseer,  
538 L., Tetzlaff, J.M., Akl, E.A., Brennan, S.E. and Chou, R., 2021. The PRISMA 2020 statement: an  
539 updated guideline for reporting systematic reviews. *International journal of surgery*, 88, p.105906.
- 540 Petersen, E., Koopmans, M., Go, U., Hamer, D.H., Petrosillo, N., Castelli, F., Storgaard, M., Al  
541 Khalili, S. and Simonsen, L., 2020. Comparing SARS-CoV-2 with SARS-CoV and influenza  
542 pandemics. *The Lancet infectious diseases*, 20(9), pp.e238-e244.
- 543 Ramos-Mandujano, G., Salunke, R., Mfarrej, S., Rachmadi, A.T., Hala, S., Xu, J., Alofi, F.S.,  
544 Khogeer, A., Hashem, A.M., Almontashiri, N.A. and Alsomali, A., 2021. A robust, safe, and  
545 scalable magnetic nanoparticle workflow for RNA extraction of pathogens from clinical and  
546 wastewater samples. *Global Challenges*, 5(4), p.2000068.
- 547 Rönnqvist, M., Ziegler, T., von Bonsdorff, C.H. and Maunula, L., 2012. Detection method for  
548 avian influenza viruses in water. *Food and environmental virology*, 4, pp.26-33.
- 549 Rusiñol, M., Martínez-Puchol, S., Forés, E., Itarte, M., Girones, R. and Bofill-Mas, S., 2020.  
550 Concentration methods for the quantification of coronavirus and other potentially pandemic  
551 enveloped virus from wastewater. *Current opinion in environmental science & health*, 17, pp.21-  
552 28.
- 553 Schwab, K. and Malleret, T., 2020, March. The great reset. In *World economic forum, Geneva*  
554 (Vol. 22).
- 555 Shaheen, M.N., 2022. The concept of one health applied to the problem of zoonotic diseases.  
556 *Reviews in Medical Virology*, 32(4), p.e2326.
- 557 Shepard, S.S., Meno, S., Bahl, J., Wilson, M.M., Barnes, J. and Neuhaus, E., 2016. Viral deep  
558 sequencing needs an adaptive approach: IRMA, the iterative refinement meta-assembler. *BMC*  
559 *genomics*, 17, pp.1-18.
- 560 Shie, J.J. and Fang, J.M., 2019. Development of effective anti-influenza drugs: congeners and  
561 conjugates—a review. *Journal of Biomedical Science*, 26(1), pp.1-20.

562 Sieben, C., Kappel, C., Zhu, R., Wozniak, A., Rankl, C., Hinterdorfer, P., Grubmüller, H. and  
563 Herrmann, A., 2012. Influenza virus binds its host cell using multiple dynamic interactions.  
564 *Proceedings of the National Academy of Sciences*, 109(34), pp.13626-13631.

565 Silverman, A.I. and Boehm, A.B., 2021. Systematic review and meta-analysis of the persistence  
566 of enveloped viruses in environmental waters and wastewater in the absence of disinfectants.  
567 *Environmental Science & Technology*, 55(21), pp.14480-14493.

568 Sims, N. and Kasprzyk-Hordern, B., 2020. Future perspectives of wastewater-based epidemiology:  
569 monitoring infectious disease spread and resistance to the community level. *Environment*  
570 *international*, 139, p.105689

571 Skelton, R.M. and Huber, V.C., 2022. Comparing influenza virus biology for understanding  
572 influenza d virus. *Viruses*, 14(5), p.1036.

573 Sooryanarain, H. and Elankumaran, S., 2015. Environmental role in influenza virus outbreaks.  
574 *Annu. Rev. Anim. Biosci.*, 3(1), pp.347-373.

575 Teirlinck, A.C., Van Asten, L., Brandsema, P.S., Dijkstra, F., Donker, G.A., van Gageldonk-  
576 Lafeber, A.B., Hooiveld, M., de Lange, M.M.A., Marbus, S.D., Meijer, A. and van der Hoek,  
577 W., 2017. Annual report Surveillance of influenza and other respiratory infections in the  
578 Netherlands: Winter 2016/2017.

579 Wang, S., Qiu, Z., Hou, Y., Deng, X., Xu, W., Zheng, T., Wu, P., Xie, S., Bian, W., Zhang, C. and  
580 Sun, Z., 2021. AXL is a candidate receptor for SARS-CoV-2 that promotes infection of pulmonary  
581 and bronchial epithelial cells. *Cell research*, 31(2), pp.126-140.

582 Wang, X., Cao, R., Zhang, H., Liu, J., Xu, M., Hu, H., Li, Y., Zhao, L., Li, W., Sun, X. and Yang,  
583 X., 2020. The anti-influenza virus drug, arbidol is an efficient inhibitor of SARS-CoV-2 in vitro.  
584 *Cell discovery*, 6(1), p.28.

585 Webster, R.G. and Govorkova, E.A., 2014. Continuing challenges in influenza. *Annals of the New*  
586 *York Academy of Sciences*, 1323(1), pp.115-139.

587 Wigginton, K.R., Ye, Y. and Ellenberg, R.M., 2015. Emerging investigators series: the source  
588 and fate of pandemic viruses in the urban water cycle. *Environmental Science: Water Research*  
589 *& Technology*, 1(6), pp.735-746.

590 Wolfe, M.K., Duong, D., Bakker, K.M., Ammerman, M., Mortenson, L., Hughes, B., Arts, P.,  
591 Lauring, A.S., Fitzsimmons, W.J., Bendall, E. and Hwang, C.E., 2022. Wastewater-based  
592 detection of two influenza outbreaks. *Environmental Science & Technology Letters*, 9(8), pp.687-  
593 692.

594 Wolkoff, P., Azuma, K. and Carrer, P., 2021. Health, work performance, and risk of infection in  
595 office-like environments: The role of indoor temperature, air humidity, and ventilation.  
596 *International Journal of Hygiene and Environmental Health*, 233, p.113709.

597 Wu, W., Zhang, W., Duggan, E.S., Booth, J.L., Zou, M.H. and Metcalf, J.P., 2015. RIG-I and  
598 TLR3 are both required for maximum interferon induction by influenza virus in human lung  
599 alveolar epithelial cells. *Virology*, 482, pp.181-188.

600 Wurtzer, S., Waldman, P., Ferrier-Rembert, A., Frenois-Veyrat, G., Mouchel, J.M., Boni, M.,  
601 Maday, Y., Marechal, V. and Moulin, L., 2021. Several forms of SARS-CoV-2 RNA can be  
602 detected in wastewaters: implication for wastewater-based epidemiology and risk assessment.  
603 *Water Research*, 198, p.117183.

604 Xagorarakis, Irene, and Evan O'Brien. "Wastewater-based epidemiology for early detection of viral  
605 outbreaks." *Women in water quality: Investigations by prominent female engineers* (2020): 75-97.

606 Ye, Y., Ellenberg, R.M., Graham, K.E. and Wigginton, K.R., 2016. Survivability, partitioning,  
607 and recovery of enveloped viruses in untreated municipal wastewater. *Environmental science &*  
608 *technology*, 50(10), pp.5077-5085.

609 Yeganeh, B., Moghadam, A.R., Tran, A.T., Rahim, M.N., Ande, S.R., Hashemi, M., Coombs,  
610 K.M. and Ghavami, S., 2013. Asthma and influenza virus infection: focusing on cell death and  
611 stress pathways in influenza virus replication. *Iranian Journal of Allergy, Asthma and*  
612 *Immunology*, pp.1-17.

613 Yewdell, J.W., 2021. Antigenic drift: understanding COVID-19. *Immunity*, 54(12), pp.2681-26

614 Zhang, H., Wang, Z., Chang, C., Javed, A., Ali, K., Du, W., Niazi, N.K., Mao, K. and Yang, Z.,  
615 2021. Occurrence of various viruses and recent evidence of SARS-CoV-2 in wastewater systems.  
616 *Journal of hazardous materials*, 414, p.125439.

It is made available under a [CC-BY 4.0 International license](#) .

It is made available under a [CC-BY 4.0 International license](#) .



1 **Supplementary Data: Figures**

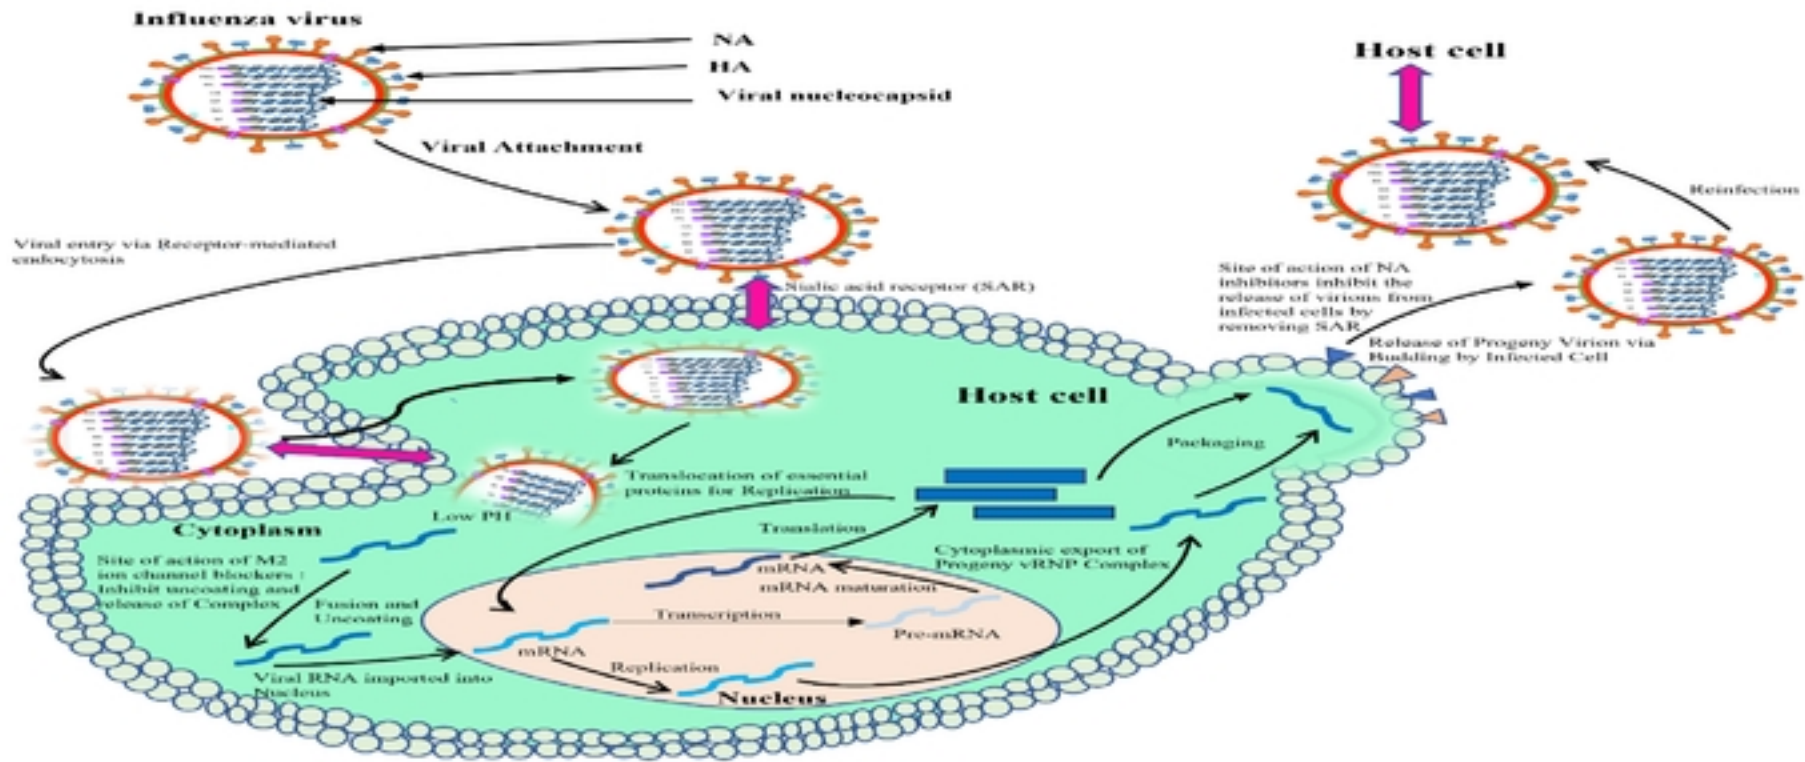

2

3

4

**Figure 2: A Pictorial Representation of Influenza Virus Lifecycle**

5

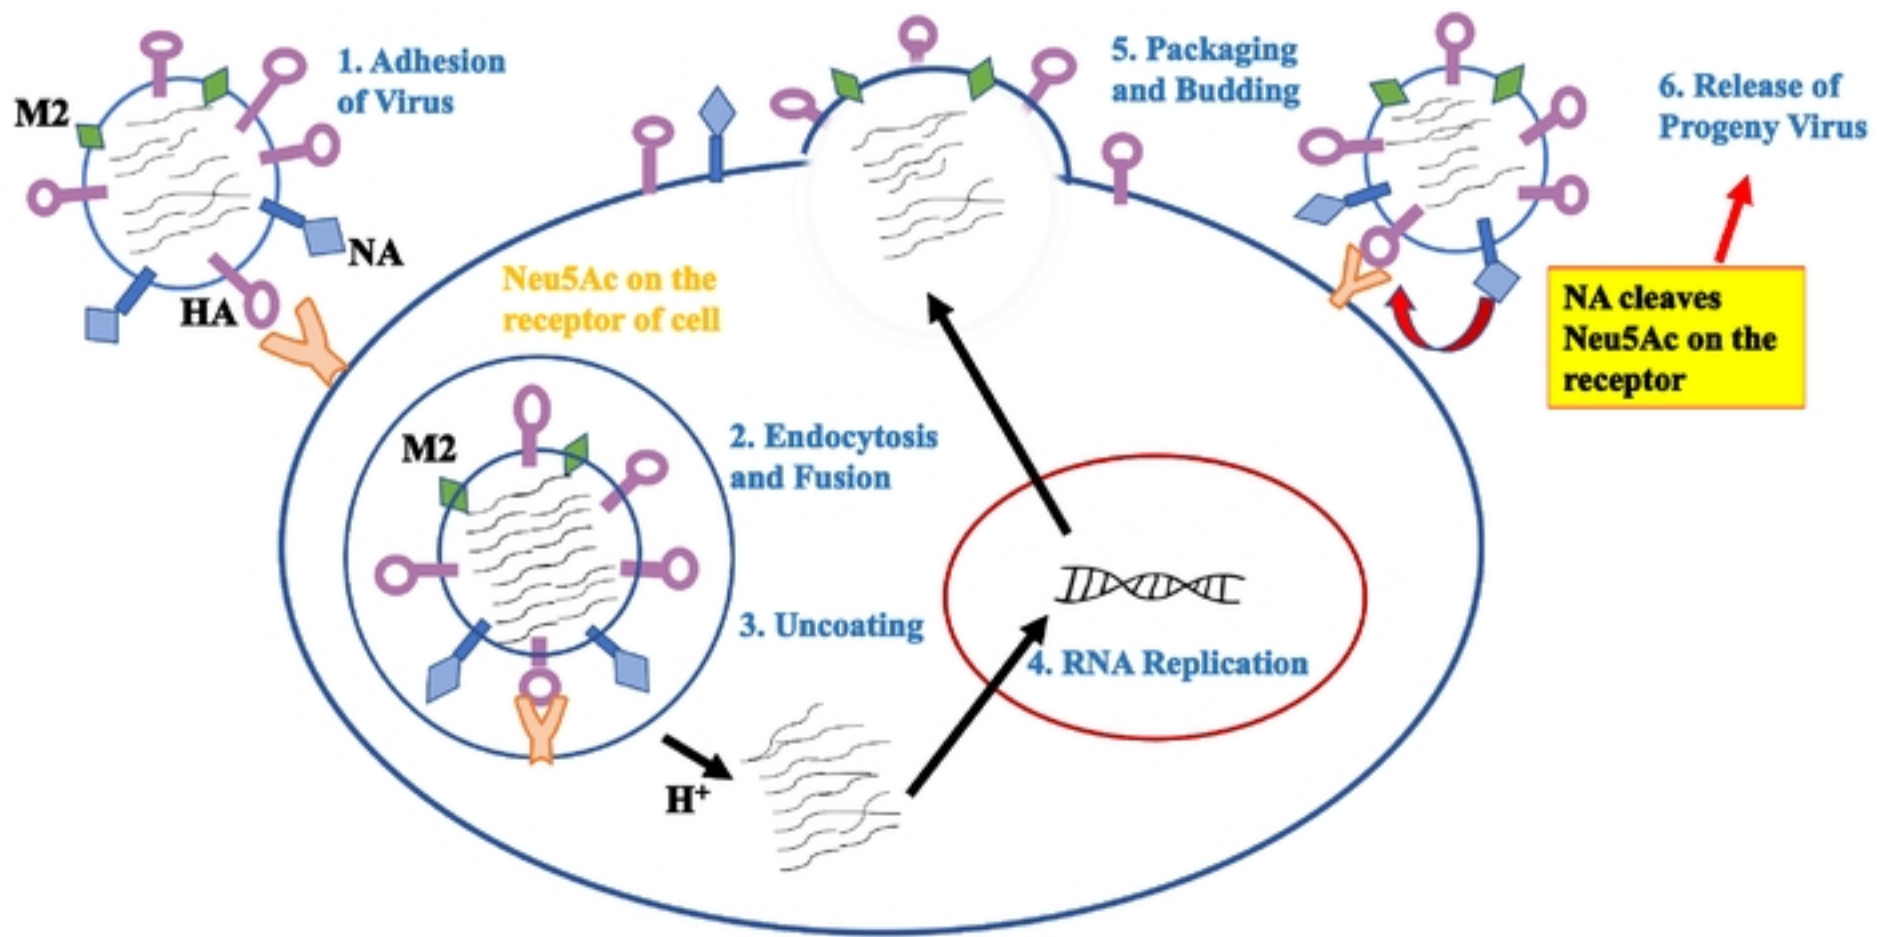

6  
7  
8  
9  
10  
11

**Figure 3:** Illustrative depiction showing the lifecycle of the influenza virus

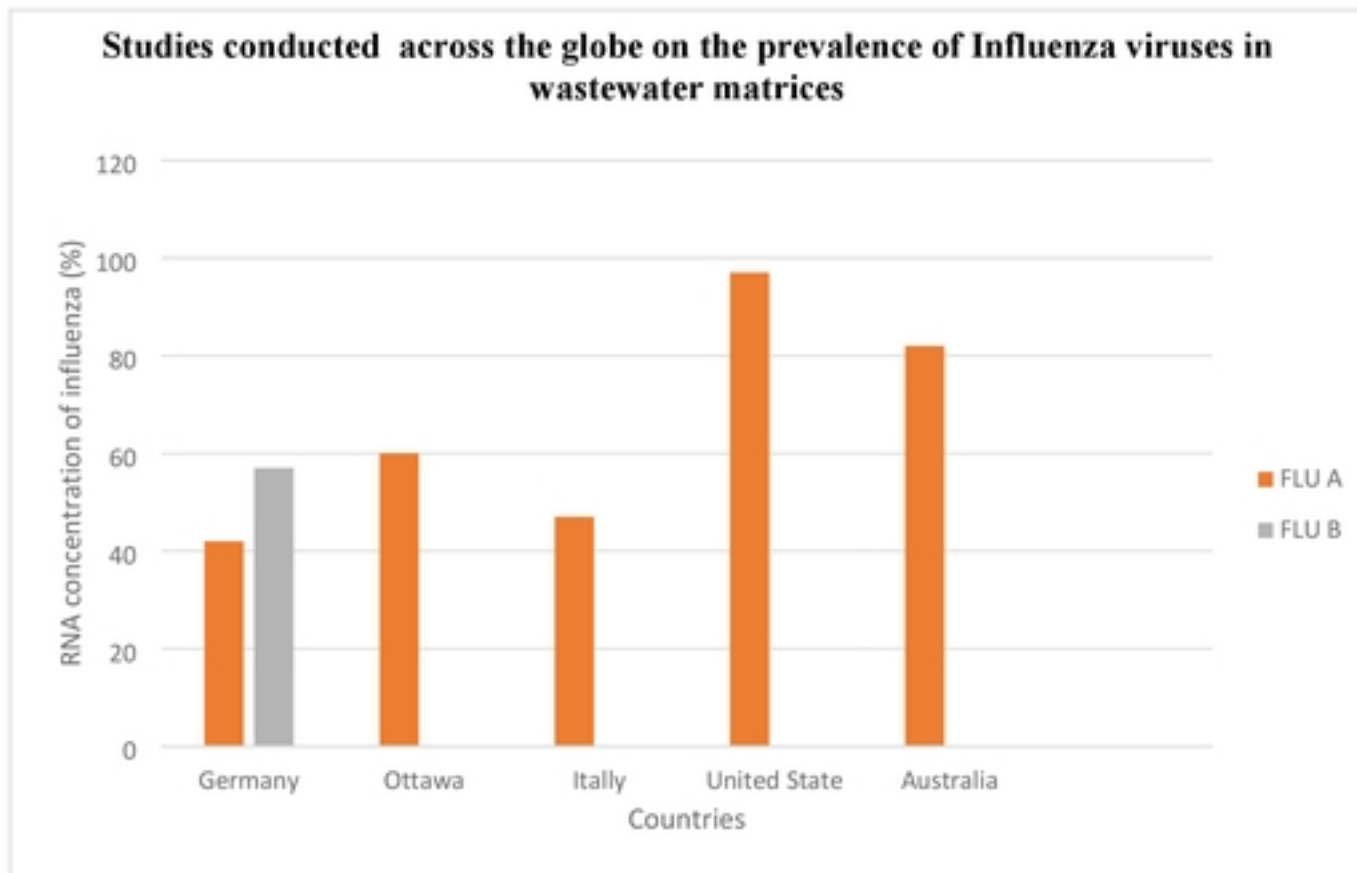

12

13 **Figure 4:** Studies conducted across the globe on the prevalence of influenza viruses associated with wastewater.

14  
15  
16  
17  
18  
19  
20  
21  
22  
23  
24  
25  
26  
27  
28  
29  
30

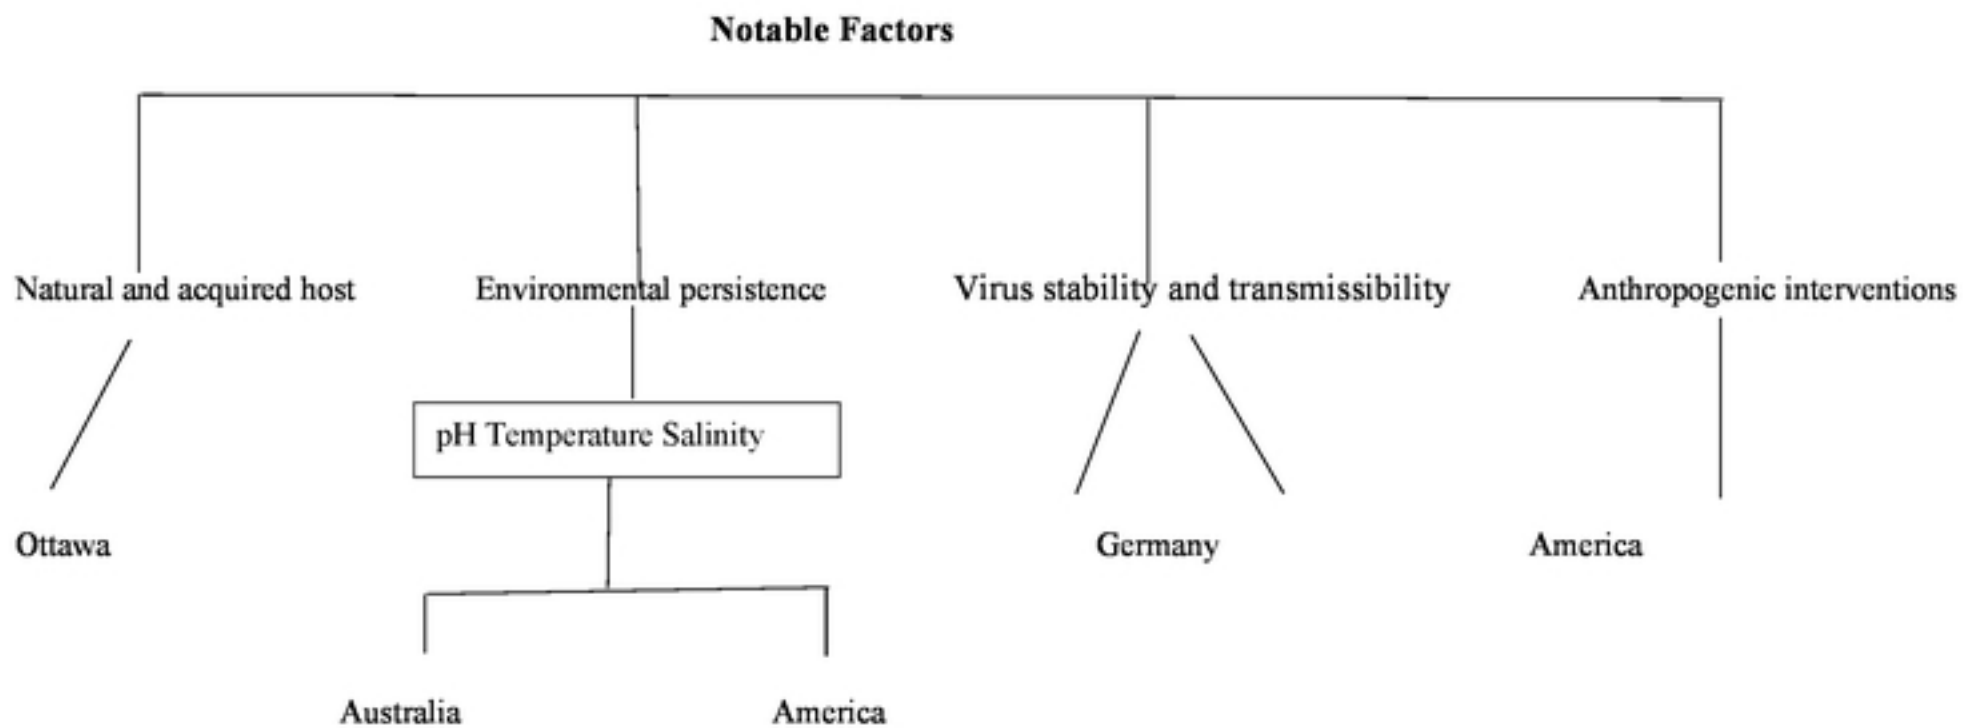

**Figure 5:** A dendrogram that illustrates some of the notable factors that influence the transmission of influenza viruses in different regions.

medRxiv preprint doi: <https://doi.org/10.1101/2023.09.12.23295340>; this version posted September 12, 2023. The copyright holder for this preprint **(which was not certified by peer review)** is the author/funder, who has granted medRxiv a license to display the preprint in perpetuity.

It is made available under a [CC-BY 4.0 International license](#) .
